# Supplementary material for: Final Year Nursing Students' Knowledge and Attitudes regarding Children's Pain
Source: Pain Res Manag. 2020 Feb 13;2020:7283473. doi: 10.1155/2020/7283473 (PMC7042548; doi:10.1155/2020/7283473)
Supplement: Supplementary Materials — These data were collected during a descriptive cross-sectional survey to assess 100 final year nursing students' knowledge and attitudes regarding children's pain. The overall goal of this was to evaluate their educational preparedness on this subject as they would soon be joining the nursing workforce to take care of patients including hospitalized children and their families. The data consist of participants' identification number, age, and gender, as well as their pediatric pain knowledge and attitudes measured using the Pediatric Nurses' Knowledge and Attitudes regarding pain (PNKAS) instrument (Manworren, 2001). The 42-item PNKAS instrument consists of 25 binary-response-type questions (true or false), 13 multiple choice questions (MCQs), and two (2) case studies expanded into four (4) questions. A correctly answered question attracted a score of one (1) whereas a wrongly answered item was given a zero (0) score. Thus, the minimum attainable score on the PNKAS instrument is zero (0), and the maximum attainable score is 42. For standardization purposes, the total score obtained by each participant was converted into percentages using the formula (score obtained/42) ∗ 100. The data file (named PNKAS Data for Final Year Nursing Students KARPP IMPT Excel) consists of two (2) excel sheets: the first sheet contains the raw coded data, and the second sheet contains the code for variables found on the raw coded data. [file 7283473.f1.xlsx]

## Sheet: PNKAS Data for Final Year Nursi
ID_No	DOB_Age	Gender	Q1	Q2	Q3	Q4	Q5	Q6	Q7	Q8	Q9	Q10	Q11	Q12	Q13	Q14	Q15	Q16	Q17	Q18	Q19	Q20	Q21	Q22	Q23	Q24	Q25	Q26	Q27	Q28	Q29	Q30	Q31	Q32	Q33	Q34	Q35	Q36	Q37	Q38	Q39	Q40	Q41	Q42	Total_PNKAS	Total_Percentage_PNKAS
1	25	2	0	1	0	1	0	0	1	0	0	1	1	0	0	1	1	0	0	0	1	1	1	0	0	1	0	0	1	1	0	1	0	0	1	0	0	0	0	0	0	0	0	0	15	35.7143
2	25	2	0	1	0	1	0	1	1	0	1	0	1	1	1	0	0	1	0	1	1	0	1	1	0	1	0	1	0	1	1	0	1	0	1	0	1	1	0	0	0	0	1	0	22	52.381
3	24	1	1	1	1	0	1	1	0	1	1	1	1	0	1	1	0	1	1	0	1	0	1	1	0	0	1	1	0	1	0	0	0	1	1	0	1	0	0	0	0	0	0	1	23	54.7619
4	21	1	0	1	1	0	1	1	0	1	1	0	1	1	1	1	1	1	0	1	0	0	1	1	0	0	0	1	1	1	0	1	0	1	0	0	0	1	0	0	0	0	0	0	21	50
5	38	2	0	0	1	1	1	0	0	0	1	0	1	1	1	1	0	0	0	1	1	0	1	0	0	0	1	0	0	1	0	0	1	0	0	0	0	0	0	0	0	0	0	0	14	33.3333
6	25	2	1	0	1	0	1	1	1	0	0	1	1	1	1	0	0	0	1	0	0	0	1	0	0	0	0	1	1	0	1	0	0	1	1	1	0	1	0	0	0	0	0	0	18	42.8571
7	29	2	0	0	0	0	1	1	0	0	1	0	1	0	1	1	0	0	1	1	1	0	1	1	1	0	0	1	1	0	0	1	1	0	1	0	0	0	0	0	0	0	1	0	18	42.8571
8	22	1	0	0	0	0	1	1	1	1	0	0	1	1	1	0	0	0	0	1	1	0	1	1	0	0	0	0	0	0	1	1	0	0	1	0	1	1	0	0	0	0	1	1	18	42.8571
9	33	2	0	0	1	1	1	0	1	0	1	1	1	1	1	1	1	1	1	1	1	0	1	1	1	1	1	1	1	0	0	1	1	1	1	0	1	1	0	0	0	0	0	0	28	66.6667
10	22	1	0	0	0	1	1	1	1	1	0	0	1	1	1	0	0	0	0	0	0	1	0	1	0	0	0	1	0	0	1	1	1	1	0	0	0	1	0	0	1	0	1	0	18	42.8571
11	21	2	0	1	0	1	1	1	0	0	0	0	1	1	0	0	0	1	1	1	0	0	1	1	0	0	0	1	0	1	1	1	0	0	0	0	0	1	0	0	0	1	0	0	17	40.4762
12	25	2	0	0	0	1	1	1	0	0	0	0	1	0	1	0	1	0	0	0	0	0	1	0	0	0	0	0	0	1	1	1	1	1	1	0	1	1	0	0	1	1	1	1	19	45.2381
13	28	2	1	0	1	1	1	1	1	0	1	0	1	0	1	0	1	0	0	1	1	0	1	1	1	0	0	0	0	0	0	0	1	0	1	0	1	0	0	0	0	0	1	0	19	45.2381
14	29	2	0	1	0	1	1	0	0	0	0	0	1	1	1	0	1	1	0	1	0	0	1	1	0	1	0	1	1	1	0	1	1	0	1	0	0	0	1	0	0	0	0	0	19	45.2381
15	35	2	0	0	0	0	0	1	1	1	1	0	1	0	1	0	0	1	1	1	1	1	1	0	0	1	1	0	1	0	1	1	0	0	0	0	1	1	0	0	0	0	0	0	19	45.2381
16	32	2	0	0	0	0	1	0	1	0	1	1	0	0	1	0	1	1	0	1	1	1	0	0	0	0	0	0	0	0	0	1	1	1	1	0	0	1	0	0	1	0	0	0	16	38.0952
17	30	2	0	1	0	1	1	1	1	0	1	0	1	0	1	0	0	0	1	1	1	0	1	0	0	1	0	1	1	1	0	1	1	1	1	0	1	1	0	0	1	0	1	0	24	57.1429
18	29	2	0	1	0	1	0	0	1	0	1	0	0	0	0	1	1	1	1	1	1	0	1	1	0	0	0	0	1	1	0	0	0	1	0	0	0	0	0	0	0	0	0	0	15	35.7143
19	25	1	0	0	0	0	1	1	0	0	1	0	1	1	1	0	0	0	1	0	0	0	1	0	0	1	0	1	1	1	1	0	0	0	1	0	0	1	0	0	0	0	0	0	15	35.7143
20	21	2	0	1	0	0	1	0	0	0	0	0	1	0	1	0	0	0	0	1	0	0	1	0	0	0	0	1	1	0	0	1	0	1	0	0	0	1	0	0	0	0	1	0	12	28.5714
21	39	1	0	0	1	0	0	0	1	1	0	0	0	1	0	0	1	1	1	0	1	0	1	0	1	1	0	0	0	0	0	1	1	0	0	0	0	0	0	0	0	0	0	0	13	30.9524
22	24	2	0	1	0	0	1	1	1	0	1	0	1	1	0	0	1	0	0	0	1	1	1	0	0	0	0	1	1	1	1	1	1	1	1	0	0	1	0	0	0	0	0	0	20	47.619
23	24	1	0	0	1	1	1	1	1	1	1	0	0	1	1	1	1	1	1	1	1	0	1	1	0	0	0	1	1	0	1	1	0	1	1	0	0	1	1	0	0	0	0	0	25	59.5238
24	36	2	0	1	1	1	1	1	1	0	1	0	1	1	1	1	1	0	1	1	1	0	1	1	1	0	1	0	1	0	0	0	1	1	1	0	0	0	0	0	0	1	0	0	24	57.1429
25	26	2	0	0	0	0	0	1	1	0	0	0	1	1	0	0	0	0	1	0	0	0	1	0	0	0	0	1	0	0	1	1	1	1	1	0	1	1	0	0	0	0	1	0	15	35.7143
26	28	1	0	0	1	1	0	1	1	1	1	1	0	1	0	0	0	0	0	0	1	0	0	0	0	0	0	0	1	0	1	1	1	0	0	0	0	0	0	1	0	0	0	0	14	33.3333
27	26	2	0	1	0	0	1	1	1	0	0	0	1	1	1	0	0	1	1	1	1	0	0	0	0	0	0	1	1	1	0	1	0	0	1	0	0	0	0	0	0	0	0	0	16	38.0952
28	24	1	0	0	0	0	1	1	1	1	0	0	0	1	1	1	1	0	1	1	1	0	1	1	0	1	1	1	0	1	0	1	0	1	0	0	1	1	0	0	0	0	0	0	21	50
29	25	2	0	1	1	0	1	1	1	1	0	0	1	1	1	0	0	1	1	0	1	0	1	0	0	0	0	0	0	0	0	0	0	0	0	0	0	1	0	0	0	0	0	0	14	33.3333
30	31	2	0	1	1	1	1	0	0	0	1	0	0	1	0	0	0	0	1	0	0	0	0	0	0	1	0	1	0	0	0	0	0	1	0	0	0	0	0	0	0	0	0	0	10	23.8095
31	21	2	0	1	1	0	1	1	0	0	1	0	0	1	1	1	0	0	1	1	1	1	1	1	1	1	1	1	0	1	1	1	0	0	1	0	1	1	1	1	0	0	1	1	28	66.6667
32	30	1	0	1	1	0	1	1	1	0	0	0	1	1	1	0	1	0	0	1	0	1	1	0	0	0	0	0	0	1	0	0	1	1	1	0	1	0	1	0	0	0	0	0	18	42.8571
33	25	1	0	1	0	0	1	0	1	0	1	0	1	0	1	0	1	1	1	1	1	0	1	1	0	0	1	0	0	0	0	0	0	0	1	0	0	1	0	0	0	0	0	0	16	38.0952
34	33	2	0	0	0	1	1	1	1	0	0	0	1	0	1	0	0	0	0	1	1	1	0	1	0	0	0	0	0	1	0	0	1	1	1	0	1	0	0	0	0	0	0	0	15	35.7143
35	34	2	1	1	1	0	1	1	1	1	1	0	0	0	1	0	1	1	0	1	1	1	1	1	1	0	1	0	1	1	1	1	1	1	1	0	1	1	0	1	1	1	1	1	32	76.1905
36	32	2	0	0	0	0	1	0	1	0	1	0	0	1	0	1	1	1	1	1	0	0	0	0	1	0	1	0	0	1	0	0	0	1	0	0	0	1	1	0	0	0	0	0	15	35.7143
37	33	2	0	1	1	1	1	0	0	0	1	0	0	1	0	0	0	0	1	0	0	0	0	0	0	1	0	1	0	0	0	0	0	1	0	0	0	1	1	1	0	0	0	0	13	30.9524
38	25	2	0	1	1	0	1	1	1	0	1	0	1	0	0	1	0	0	0	1	0	0	1	1	1	0	0	1	1	0	0	1	1	1	0	0	0	1	0	0	0	0	0	0	18	42.8571
39	27	1	0	1	1	0	1	0	1	0	1	1	0	1	0	0	1	0	0	1	1	0	1	1	1	0	0	1	0	1	1	0	1	0	1	0	1	1	0	0	0	0	0	0	20	47.619
40	30	2	0	0	0	1	0	0	0	1	1	0	1	0	0	0	1	0	1	1	1	0	0	0	0	1	0	0	1	0	0	1	1	1	1	0	0	1	0	0	0	0	0	0	15	35.7143
41	28	2	0	1	1	0	0	0	1	0	0	1	1	1	1	0	1	0	0	0	0	0	1	1	1	0	1	0	0	0	0	1	1	0	1	0	0	0	0	0	0	0	0	0	15	35.7143
42	23	2	0	0	0	1	1	1	1	1	0	0	1	1	1	0	0	0	1	0	0	0	1	1	0	1	1	1	1	0	0	0	0	1	1	0	0	1	0	0	0	0	1	0	19	45.2381
43	28	2	0	1	0	0	1	1	1	0	1	0	0	1	1	0	1	1	1	0	0	0	1	0	0	0	0	1	0	0	1	0	0	1	1	0	0	0	1	0	1	0	0	0	17	40.4762
44	21	2	0	1	1	0	1	1	1	0	0	0	1	1	1	1	0	1	1	1	1	0	1	1	0	0	1	1	1	0	1	0	0	1	1	0	1	1	0	0	1	1	1	1	27	64.2857
45	30	1	1	1	0	0	0	1	1	1	1	0	1	1	0	0	0	0	1	0	1	1	1	0	0	0	0	1	1	0	1	0	1	1	0	0	0	1	1	0	0	0	0	0	19	45.2381
46	32	2	0	1	1	1	1	1	1	0	1	0	1	1	1	0	0	1	0	1	1	0	1	1	0	0	0	0	0	1	0	0	1	1	0	0	1	0	0	0	0	0	0	0	19	45.2381
47	29	2	0	0	1	1	1	1	0	1	0	0	1	1	1	0	0	1	0	1	1	0	1	1	0	0	0	0	0	1	0	1	1	1	0	0	1	0	0	0	0	0	0	0	18	42.8571
48	30	2	1	1	0	0	0	1	1	1	1	0	1	1	0	0	0	0	1	0	1	1	1	0	0	0	0	0	1	0	1	0	1	1	0	0	0	1	1	0	0	0	0	0	18	42.8571
49	25	2	0	0	0	0	1	0	1	0	0	1	1	0	0	1	0	1	1	0	1	0	0	0	0	1	1	0	0	0	0	0	1	0	0	0	0	0	1	0	0	0	0	0	12	28.5714
50	29	2	0	0	0	0	1	0	0	0	1	0	0	1	0	0	1	1	0	0	0	0	0	1	1	1	0	0	0	0	1	1	1	1	1	0	0	0	0	0	0	0	0	0	13	30.9524
51	32	2	0	1	1	0	1	1	1	0	1	0	1	1	0	0	0	0	1	0	0	0	1	0	1	0	0	1	0	1	1	0	0	1	1	0	0	0	0	0	0	0	0	0	16	38.0952
52	38	2	0	0	1	1	1	0	0	0	1	0	1	1	1	1	0	0	0	1	1	1	1	0	0	0	1	0	0	1	0	0	1	0	0	0	0	0	0	0	0	0	0	0	15	35.7143
53	30	1	0	1	0	0	1	1	1	1	0	0	1	1	1	0	1	0	1	0	1	1	1	0	0	0	0	0	0	1	0	0	0	1	1	0	0	0	0	0	0	0	0	0	16	38.0952
54	27	2	1	1	1	1	1	1	0	0	1	0	1	0	1	0	0	0	1	1	1	1	1	1	0	1	0	0	0	1	0	1	1	1	0	0	1	0	0	0	1	0	1	0	23	54.7619
55	30	2	0	0	0	0	0	1	0	0	1	0	1	0	1	0	0	0	1	1	1	1	1	1	1	1	0	0	0	1	0	1	1	1	0	0	1	0	0	0	1	0	1	0	19	45.2381
56	32	2	0	1	0	0	1	1	0	1	1	0	1	1	0	1	1	1	1	0	1	1	1	0	0	0	0	0	1	0	0	1	0	0	1	0	0	0	1	0	0	0	0	1	19	45.2381
57	35	2	0	1	0	0	1	1	0	0	1	0	1	0	0	1	1	0	0	0	1	1	1	0	0	1	1	1	0	1	1	0	0	0	0	0	0	0	0	0	1	0	1	1	18	42.8571
58	28	2	1	1	1	0	1	1	1	1	0	0	1	1	1	1	1	1	1	1	1	1	1	1	1	1	1	0	1	1	1	1	1	1	1	0	1	1	0	1	1	1	1	1	36	85.7143
59	25	2	0	1	0	1	0	1	0	0	1	0	0	1	1	1	0	0	1	0	0	0	0	0	1	0	0	0	0	0	1	1	1	0	1	0	0	0	1	0	1	0	0	0	15	35.7143
60	33	2	0	0	1	0	0	0	0	1	0	0	0	1	0	1	1	0	0	0	1	0	1	1	0	0	0	0	0	0	1	1	0	1	1	0	1	0	0	0	1	0	1	0	15	35.7143
61	31	2	0	1	1	0	1	1	0	1	1	0	1	1	0	1	1	1	1	0	1	1	1	0	0	1	0	0	1	0	0	1	0	0	1	0	0	0	0	0	1	0	0	0	20	47.619
62	35	1	0	0	0	0	1	1	1	0	1	0	1	1	1	0	0	1	1	1	0	0	1	1	0	0	0	1	0	1	1	0	1	1	0	0	0	0	0	0	0	0	0	0	17	40.4762
63	31	2	0	1	0	1	1	1	1	0	1	1	1	1	1	0	0	1	1	0	1	0	1	0	0	1	1	0	0	0	0	1	0	1	0	1	0	1	0	0	0	0	0	1	21	50
64	27	2	0	1	0	1	1	1	1	0	1	1	1	1	1	0	0	1	1	0	0	0	1	1	0	0	1	1	0	1	0	0	1	0	0	0	1	0	0	0	0	0	0	0	19	45.2381
65	24	2	0	1	0	1	1	1	1	0	1	0	1	1	1	0	1	1	1	0	0	0	0	0	1	0	0	0	1	0	0	1	0	1	0	0	0	0	1	0	0	0	0	0	17	40.4762
66	25	2	1	1	1	0	1	1	0	1	1	1	0	0	1	1	1	0	0	0	0	0	1	1	1	1	1	0	0	0	0	0	0	1	1	0	0	0	0	1	0	0	0	0	19	45.2381
67	30	2	0	0	0	1	1	1	1	0	0	1	1	1	0	1	0	1	1	0	0	0	0	0	0	1	0	1	1	0	0	0	0	0	1	0	0	0	1	1	0	0	0	0	16	38.0952
68	33	2	1	1	1	0	1	1	0	1	1	0	0	0	0	1	0	1	1	0	1	0	0	0	1	0	0	1	0	0	0	1	1	1	0	0	0	0	0	0	0	0	0	1	17	40.4762
69	34	2	1	0	0	0	1	1	1	1	0	1	1	0	1	0	0	0	1	1	1	0	1	1	0	1	0	0	0	1	1	0	0	1	0	0	0	0	1	0	1	0	0	0	19	45.2381
70	32	2	0	1	1	0	1	1	0	0	1	0	1	0	1	1	0	0	0	1	1	1	1	0	0	1	0	0	1	0	0	1	0	0	1	0	0	0	0	0	0	0	1	0	17	40.4762
71	47	2	0	1	0	0	1	0	0	0	1	0	1	1	0	1	0	0	0	0	1	1	1	0	1	0	0	1	1	0	0	0	0	1	0	0	0	0	0	0	0	1	0	0	14	33.3333
72	29	2	0	1	0	1	1	1	1	0	1	0	1	1	1	0	0	0	1	1	0	0	1	1	0	0	0	0	0	0	0	0	0	0	1	0	0	0	1	0	0	0	0	1	16	38.0952
73	42	2	1	1	1	0	1	1	1	0	0	0	1	0	1	1	0	1	1	1	1	0	1	1	1	0	1	1	1	0	0	1	1	1	1	0	1	1	0	0	0	0	0	0	25	59.5238
74	34	2	0	1	0	1	0	1	0	1	1	0	0	1	1	0	1	0	1	0	0	1	1	1	0	1	0	1	1	0	0	0	0	1	0	0	0	0	0	1	0	0	0	0	17	40.4762
75	37	2	0	0	0	0	1	1	1	0	0	0	1	1	0	0	0	0	1	0	0	0	1	0	0	0	0	0	1	1	1	0	0	0	0	0	0	0	1	0	0	0	0	0	11	26.1905
76	28	2	1	1	1	0	0	0	1	0	0	0	0	1	1	0	0	0	1	1	1	0	1	0	0	0	1	1	0	0	1	0	1	1	1	0	0	0	0	0	0	0	1	0	17	40.4762
77	35	2	0	1	0	0	1	1	1	0	1	0	0	1	0	1	1	1	1	0	0	0	1	1	0	0	1	1	0	1	1	1	0	1	1	0	1	0	1	0	0	0	0	0	21	50
78	36	2	0	1	1	1	1	1	1	0	0	0	1	1	1	0	0	0	1	1	1	0	1	0	1	0	1	1	0	0	1	1	1	0	0	0	0	1	0	0	0	0	0	0	20	47.619
79	24	2	0	0	0	0	0	1	0	0	0	0	0	1	0	0	0	1	1	0	1	0	1	1	0	0	1	0	1	0	0	1	1	0	0	0	0	0	0	0	0	0	0	0	11	26.1905
80	28	2	1	1	1	0	1	1	0	1	1	1	1	1	1	0	0	1	1	1	1	0	1	0	1	0	0	1	0	1	0	0	1	1	0	0	1	1	1	0	0	0	0	1	25	59.5238
81	25	2	0	1	0	1	0	0	1	1	0	1	1	1	1	1	0	1	0	0	1	0	0	1	0	0	1	0	0	0	0	0	1	1	1	0	1	1	0	0	0	0	0	0	18	42.8571
82	34	2	0	0	0	0	1	0	1	1	0	0	0	0	0	0	1	0	1	1	1	0	1	0	1	0	1	0	0	0	0	0	0	0	1	0	1	1	1	0	0	0	0	0	14	33.3333
83	25	2	0	1	1	1	1	1	0	1	1	1	1	1	1	0	1	0	1	0	0	0	1	1	0	0	0	1	0	1	1	0	1	0	1	0	0	1	0	0	0	0	1	0	22	52.381
84	21	2	0	0	1	1	1	1	1	0	1	0	1	1	0	0	0	0	1	1	0	1	1	1	0	0	0	0	0	1	1	0	0	1	0	0	1	1	0	0	1	0	1	1	21	50
85	24	1	1	0	1	1	1	1	1	0	1	0	0	1	0	0	0	0	1	1	1	1	1	0	0	0	1	1	0	1	1	0	0	1	0	0	1	1	0	0	1	0	0	0	21	50
86	22	1	0	1	0	0	1	1	0	0	0	0	1	1	1	1	0	0	1	1	1	1	1	1	0	1	0	1	1	0	1	0	0	0	1	0	0	0	0	0	0	0	0	1	19	45.2381
87	32	2	0	0	1	0	1	0	1	0	1	0	0	1	1	1	1	0	1	1	1	0	0	0	0	1	1	1	0	0	0	0	1	0	1	0	0	1	0	0	0	0	1	0	18	42.8571
88	29	2	0	0	1	0	0	1	0	0	1	1	1	0	1	1	1	0	1	1	0	1	0	0	0	0	0	0	0	1	0	1	0	0	0	0	0	0	0	0	0	0	0	0	13	30.9524
89	21	1	1	0	1	0	1	1	1	0	0	0	1	0	1	0	1	0	1	1	0	0	1	1	0	0	0	0	1	1	1	1	1	1	1	0	1	1	0	0	1	0	1	0	23	54.7619
90	31	2	0	1	1	0	0	0	0	0	1	1	1	0	1	0	1	0	1	1	0	1	1	1	1	1	1	0	1	1	1	1	1	1	1	0	1	1	0	0	1	1	1	1	28	66.6667
91	28	2	0	0	0	0	1	1	0	1	1	0	1	0	0	0	0	0	1	0	1	0	1	0	0	0	1	1	0	1	0	0	0	0	1	0	0	0	0	0	1	0	1	0	14	33.3333
92	28	2	0	1	1	0	1	1	1	0	1	0	1	0	1	0	0	1	1	1	1	0	1	0	1	1	0	0	0	1	0	0	0	1	1	0	1	1	0	0	0	0	0	0	20	47.619
93	28	2	0	0	1	0	0	1	1	0	1	0	1	1	1	0	0	0	1	1	1	0	1	0	0	1	0	0	1	0	0	0	1	0	0	0	0	0	0	0	0	0	0	0	14	33.3333
94	30	1	0	1	1	0	1	1	1	0	1	0	1	0	1	0	1	0	1	1	1	1	0	1	0	1	1	0	0	0	0	0	1	1	0	0	1	1	0	0	0	0	0	0	20	47.619
95	26	1	1	1	1	0	1	1	0	0	0	0	1	1	1	0	0	0	1	1	1	0	1	1	0	1	1	1	1	1	1	0	1	0	0	0	1	1	0	0	1	0	1	0	24	57.1429
96	23	1	1	1	1	0	0	1	1	1	1	0	1	1	1	0	0	0	1	1	0	0	1	0	1	1	0	0	0	1	0	1	1	0	0	0	1	0	1	0	0	0	1	1	22	52.381
97	26	1	0	0	1	0	1	1	1	1	0	0	1	1	1	0	0	1	1	0	1	0	1	1	0	0	0	1	0	0	1	1	0	0	1	0	0	1	0	0	0	0	1	1	20	47.619
98	26	2	1	0	1	0	1	1	1	1	0	0	1	0	1	0	1	0	1	1	0	0	1	0	0	1	0	0	1	0	1	1	0	0	1	0	1	1	0	0	0	0	1	1	21	50
99	32	2	0	1	0	1	1	1	1	0	1	0	0	0	1	0	1	1	0	1	1	0	1	1	0	0	1	0	1	1	1	0	1	1	1	0	1	0	1	0	0	0	0	0	22	52.381
100	24	2	0	0	1	0	1	1	0	0	0	0	1	1	1	0	0	0	1	1	0	0	1	0	1	0	0	1	0	0	0	1	1	0	0	0	0	1	1	0	0	0	0	0	15	35.7143

## Sheet: Code Sheet
Codebook for final year nursing students’ knowledge and attitudes regarding children’s pain
Variable Name	Variable Label
ID_No	Identification number
DOB_Age	Age in years
Gender
1	Male
2	Female
NB: Scoring Scheme for all questions (Q1-Q42)
1	Correct Score
0	Wrong Score
NB: Options for questions from 1-25
T	TRUE
F	FALSE
Q1	Observable changes in vital signs must be relied upon to verify a child’s/ adolescent’s statement that he/she has severe pain. F
Q2	Because their nervous system is underdeveloped, children under 2 years of age have decreased pain sensitivity and limited memory of painful experiences. F
Q3	Pediatric patients (infants, children, adolescents) who can be distracted from pain usually do not have severe pain. F
Q4	The usual duration of analgesia of morphine IV is 4-5 hours. F
Q5	Comparable stimuli in different people produce the same intensity of pain. F
Q6	Children who will require repeated painful procedures (e.g., daily blood draws), should receive maximum treatment for the pain and anxiety of the first procedure to minimize the development of anticipatory anxiety before subsequent procedures. T
Q7	Respiratory depression rarely occurs in children/ adolescents who have been receiving stable doses of opioids over a period of months. T
Q8	Infants/ children/ adolescents may sleep in spite of severe pain. T
Q9	Ibuprofen and other nonsteroidal anti-inflammatory agents are NOT effective analgesics for bone pain caused by metastases. F
Q10	Non-drug interventions (e.g. guided imagery, biofeedback, transcutaneous electrical nerve stimulation(TENS) etc.) are very effective for mild-moderate pain control but are rarely helpful for more severe pain. F
Q11	Combining analgesics and non-drug therapies that work by different mechanisms (e.g. using acetaminophen, topical anesthetics, sucrose, and non-nutritive sucking) may result in better pain control with fewer side effects than using a single analgesic agent. T
Q12	Benzodiazepines do not reliably potentiate the analgesia of opioids’ unless the pain is related to muscle spasms. T
Q13	Parents should not be present during painful procedures. F
Q14	Adolescents with a history of substance abuse should not be given opioids for pain because they are at high risk for repeated addiction. F
Q15	Beyond a certain dosage of morphine, increases in dosage will NOT provide increased pain relief. F
Q16	Young infants, less than 6 months of age, cannot tolerate opioids for pain relief. F
Q17	Spiritual beliefs may lead a child /adolescent to think that pain and suffering are necessary. T
Q18	The child/adolescent with pain should be encouraged to endure as much pain as possible before resorting to an opioid for pain. F
Q19	Children, less than 8 years, cannot reliably report pain intensity and therefore, the nurse should rely on the parent’s assessment of the child’s pain intensity. F
Q20	Anxiolytics, sedatives and barbiturates are appropriate medications for the relief of pain during painful procedures. F
Q21	After the initial recommended dose of opioid analgesic, subsequent doses should be adjusted in accordance with the individual patient’s response. T
Q22	The child/adolescent should be advised to use non-drug techniques alone rather than concurrently with pain medications. F
Q23	Giving children/adolescents sterile water by injection (placebo) is often a useful test to determine if the pain is real. F
Q24	Sedation always precedes opioid related respiratory. F
Q25	Opioid /narcotic addiction is defined as a chronic neurological disease, characterized by impaired control over drug use, compulsive use, continued used despite harm, and craving of tolerance to analgesia and physical dependence (withdrawal) Given this information, all children /adolescents whose pain has been treated with opioids for longer than a month are addicted to opioids. F
Q26	The recommended route of administration of opioid analgesics to children with prolonged cancer-related pain is:
A	Intravenous
B	Intramuscular
C	Subcutaneous
D	Oral
E	Rectal
F	I don’t know
Q27	The usual time to peak effects for traditional analgesics (acetaminophen, NSAIDS, and opioids given orally is:
A	15 minutes
B	30 minutes
C	60 minutes
D	4 Hours
Q28	The recommended route administration of opioid analgesics to children with brief, severe pain of sudden onset, e.g., trauma or postoperative pain is:
A	Intravenous
B	Intramuscular
C	Subcutaneous
D	Oral
E	Rectal
F	I don’t know
Q29	Which of the following analgesic medications is considered the drug of choice for the treatment of prolonged moderate to severe pain for children with cancer?
A	Acetaminophen
B	Codeine
C	Morphine
D	Meperidine (Demerol)
E	I don’t know
Q30	Which of the following IV doses of morphine administered would be equivalent to 15 mg of oral morphine?
A	Morphine 3 mg IV
B	Morphine 5 mg IV
C	Morphine 10 mg IV
D	Morphine 15 mg IV
Q31	Analgesics for post-operative pain should initially be given:
A	Around the clock on a fixed schedule
B	Only when the child/adolescent asks for the medication
C	Only when the nurse determines that the child/adolescent has moderate or greater discomfort
Q32	Analgesia for chronic cancer pain should be given:
A	Around the clock on a fixed schedule
B	Only when the child asks for the medication
C	Only when the nurse determines that the child has moderate or greater discomfort
Q33	The most likely explanation for why a child/adolescent with pain would request increased doses of pain medication is that:
A	The child/adolescent is experiencing increased pain.
B	The child/adolescent is experiencing increased anxiety or depression.
C	The child/adolescent is requesting more staff attention.
D	The child’s/adolescent’s requests are related to addiction.
Q34	Which of the following drugs are potentially useful for treatment of children’s cancer pain?
A	Non-steroidal anti-inflammatory drugs (NSAIDS)
B	Opioid analgesics
C	Anti-depressants
D	Anti-convulsant
E	All of the above
Q35	The most accurate judge of the intensity of the child’s/adolescent’s pain is the:
A	Treating physician
B	Child’s/adolescent’s primary nurse
C	Child/adolescent
D	Pharmacist
E	Child’s/adolescent’s parent
Q36	Which of the following describes the best approach for cultural considerations in caring for child/adolescent in pain?
A	There are no longer cultural influences on the pain experience in united states due to the diversity of the population.
B	Healthcare providers should use knowledge that has defined clearly the influence of pain on cultural (e.g. Asians are generally stoic, Hispanics are expressive and exaggerate their pain etc.)
C	Children/adolescents should be individually assessed to determine cultural influences on pain
Q37	What do you think is the percentage of patients who over report the amount of pain they have? Circle the correct answer.
A	0
B	10
C	20
D	30
E	40
F	50
G	60
H	70
I	80
J	90
K	100
Q38	Narcotic/opioid addiction is defined as psychological dependence accompanied by overwhelming concern with obtaining and using narcotics for psychic effect, not for medical reasons. It may occur with or without the physiological changes of tolerance to analgesia and physical dependence (withdrawal). Using this definition, how likely is it that opioid addiction will occur as a result of treating pa…
A	<1%
B	0.05
C	0.25
D	0.5
E	0.75
F	1
Case Study 1 (Q39-Q40)	Patient A: Andrew is 15 years old and this is his first day following abdominal surgery. As you enter his room, he smiles at you and continues talking and joking with his visitor. Your assessment reveals the following information: BP = 120/80; HR = 80; R = 18; on a scale of 0 to 10 (0 = no pain/discomfort, 10 = worst pain/discomfort), he rates his pain as 8.
Q39	On the patient’s record you must mark his pain on the scale below. Circle the number that represents your assessment of Andrew’s pain.
A	0
B	1
C	2
D	3
E	4
F	5
G	6
H	7
I	8
J	9
K	10
Q40	Your assessment, above, is made two hours after he received morphine 2 mg IV. After he received the morphine, his pain ratings every half-hour ranged from 6 to 8 and he had no clinically significant respiratory depression, sedation, or other untoward side
A	Administer no morphine at this time.
B	Administer morphine 1 mg IV now.
C	Administer morphine 2 mg IV now.
D	Administer morphine 3 mg IV now.
Case Study 2 (Q41-Q42)	Patient B: Robert is 15 years old and this is his first day following abdominal surgery. As you enter his room, he is lying quietly in bed and grimaces as he turns in bed. Your assessment reveals the following information: BP = 120/80; HR = 80; R = 18; on a scale of 0 to 10 (0 = no pain/discomfort, 10 = worst pain/discomfort), he rates his pain as 8.
Q41	On the patient’s record you must mark his pain on the scale below. Circle the number that represents your assessment of Robert’s pain:
A	0
B	1
C	2
D	3
E	4
F	5
G	6
H	7
I	8
J	9
K	10
Q42	Your assessment, above, is made two hours after he received morphine 2 mg IV. After he received the morphine, his pain ratings every half-hour ranged from 6 to 8 and he had no clinically significant respiratory depression, sedation, or other untoward side
A	Administer no morphine at this time.
B	Administer morphine 1 mg IV now.
C	Administer morphine 2 mg IV now.
D	Administer morphine 3 mg IV now.
